# Supplementary material for: Generation of Human Antigen-Specific Monoclonal IgM Antibodies Using Vaccinated “Human Immune System” Mice
Source: PubMed Central journal article supplement (PMC2949385; doi:10.1371/journal.pone.0013137), 2010-10-04
Supplement: pone.0013137.s004.pdf [file pone.0013137.s004.pdf]

**Table S3. IgM V<sub>H</sub> amino-acid sequence of generated HBsAg-specific B cell clones.**

| CLONES           | -----FR1-----              | ---CDR1--- | -----FR2-----     | ---CDR2--- | -----FR3----- | ---CDR3---                       | ---FR4---                 |             |
|------------------|----------------------------|------------|-------------------|------------|---------------|----------------------------------|---------------------------|-------------|
| <u>VH3-73</u>    | EVQLVESGGGLVQPGGSLKLSCAAS  | GFTFSGSA   | MHWVRQASGKGLEWVGR | IRSKANSYAT | AYAASVK       | GRFTISRDDSKNTAYLQMNSLKTEDTAVYYC  | TR                        | WGQGLTVTVSS |
| <u>6β2-D4-3</u>  | GGGLVQPGGSLKLSCAAS         | GFTFSGSA   | MHWVRQASGKGLEWVGR | IRSKANSYAT | AYAASVK       | GRFTISRDDSKNTAYLQMNSLKTEDTAVYYC  | TR <b>SRKSSSSDY</b>       | WGQGLTVTVSS |
| <u>6β1-E3-10</u> | EVQLVESGGGLVQPGGSLKLSCAAS  | GFTFSGSA   | MHWVRQASGKGLEWVGR | IRSKANSYAT | AYAASVK       | GRFTISRDDSKNTAYLQMNSLKTEDTAVYYC  | TR <b>SRKSSSSDY</b>       | WGQGLTVTVSS |
| <u>3β2-F2-2</u>  | EVQLVESGGGLVQPGGSLKLSCAAS  | GFTFSGSA   | MHWVRQASGKGLEWVGR | IRSKANSYAT | AYAASVK       | GRFTISRDDSKNTAYLQMNSLKTEDTAVYYC  | TR <b>LSGRGVVDY</b>       | WGQGLTVTVSS |
| <u>6β2-G11-6</u> | EVQLVESGGGLVQPGGSLKLSCAAS  | GFTFSGSA   | MHWVRQASGKGLEWVGR | IRSKANSYAT | AYAASVK       | GRFTISRDDSKNTAYLQMNSLKTEDTAVYYC  | TR <b>KSSSSDY</b>         | WGQGLTVTVSS |
| <u>5β2-D5-5</u>  | EVQLVESGGGLVQPGGSLKLSCAAS  | GFTFSGSA   | MHWVRQASGKGLEWVGR | IRSKANSYAT | AYAASVK       | GRFTISRDDSKNTAYLQMNSLKTEDTAVYYC  | TR <b>YSSSSWYFDY</b>      | WGQGLTVTVSS |
| <u>γ5-8</u>      | EVQLVESGGGLVQPGGSLKLSCAAS  | GFTFSGSA   | MHWVRQASGKGLEWVGR | IRSKANSYAT | AYAASVK       | GRFTISRDDSKNTAYLQMNSLKTEDTAVYYC  | TR <b>YSSSSWYFDY</b>      | WGQGLTVTVSS |
| <u>γ6-7</u>      | EVQLVESGGGLVQPGGSLKLSCAAS  | GFTFSGSA   | MHWVRQASGKGLEWVGR | IRSKANSYAT | AYAASVK       | GRFTISRDDSKNTAYLQMNSLKTEDTAVYYC  | TR <b>RGYYGSGSYG DY</b>   | WGQGLTVTVSS |
| <u>5β1-E3-5</u>  | EVQLVESGGGLVQPGGSLKLSCAAS  | GFTFSGSA   | MHWVRQASGKGLEWVGR | IRSKANSYAT | AYAASVK       | GRFTISRDDSKNTAYLQMNSLKTEDTAVYYC  | TR <b>RGYYGSGSYG DY</b>   | WGQGLTVTVSS |
| <u>VH4-34</u>    | QVQLQQWAGLLKPKSETLSLTCAVY  | GGSFSGYY   | WSWIRQPPGKGLEWIGE | INHSGST    | NYNPSLK       | SRVTISVDTSKNQFSLKLSVTAADTAVYYC   | AR                        | WGQGLTVTVSS |
| <u>2β2-D6-11</u> | QVQLQQWAGLLKPKSETLSLTCAVY  | GGSFSSYY   | WSWIRQPPGKGLEWIGE | INHSGST    | NYNPSLK       | SRVTISVDTSKNQFSLKLSVTAADTAVYYC   | AR <b>GFHY</b>            | WGQGLTVTVSS |
| <u>VH3-30</u>    | QVQLVESGGGVVQPGRSRLRLSCAAS | GFTFSSYG   | MHWVRQAPGKGLEWVAV | ISYDGSNK   | YYADSVK       | GRFTISRDN SKNTLYLQMNSLRAEDTAVYYC | AR                        | WGQGLTVTVSS |
| <u>3β2-G1-7</u>  | QVQLVESGGGVVQPGRSRLRLSCAAS | GFTFSSYG   | MHWVRQAPGKGLEWVAV | ISYDGSNK   | YYADSVK       | GRFTISRDN SKNTLYLQMNSLRAEDTAVYYC | AR <b>KAVVDRARDGYNLGY</b> | WGQGLTVTVSS |
| <u>γ6-14</u>     | PGRSLRLSCAAS               | GFTFSSYA   | MHWVRQAPGKGLEWVAV | ISYDGSNK   | YYADSVK       | GRFTISRDN SKNTLYLQMNSLRAEDTAVYYC | AR <b>GTYYGSGIGFDY</b>    | WGQGLTVTVSS |
| <u>VH3-15</u>    | EVQLVESGGGLVKPGGSLRLSCAAS  | GFTFSNAW   | MSWVRQAPGKGLEWVGR | IKSKTDGGTT | DYAAPVK       | GRFTISRDDSKNTLYLQMNSLKTEDTAVYYC  | TT                        | WGQGLTVTVSS |
| <u>2β2-H8-2</u>  | EVQLVESGGGLVKPGGSLRLSCAAS  | GFTFSNAW   | MSWVRQAPGKGLEWVGR | IKSKTDGGTT | DYAAPVK       | GRFTISRDDSKNTLYLQMNSLKTEDTAVYYC  | TR <b>LINWGIRD</b>        | WGQGLTVTVSS |
| <u>γ2-15</u>     | GSLRLSCAAS                 | GFTFSNAW   | MSWVRQAPGKGLEWVGR | IKSKTDGGTT | DYAAPVK       | GRFTISRDDSKNTLYLQMNSLKTEDTAVYYC  | TR <b>LINWGIRD</b>        | WGQGLTVTVSS |
| <u>VH5-51</u>    | EVQLVQSGAEVKKPGESLKISCKGS  | GYSFTSYW   | IGWVRQMPGKGLEWMGI | IYPGDSDT   | RYSPSFQ       | GQVTISADKSISTAYLQWSSLKASDTAMYYC  | AR                        | WGQGLTVTVSS |
| <u>γ1-4</u>      | EVQLVQSGAEVKKPGESLKISCKGS  | GYSFTSYW   | IGWVRQMPGKGLEWMGI | IYPGDSDT   | RYSPSFQ       | GQVTISADKSISTAYLQWSSLKASDTAMYYC  | AR <b>HSEYIYDSSGYLDY</b>  | WGQGLTVTVSS |
| <u>VH5-A</u>     | EVQLVQSGAEVKKPGESLRISCKGS  | GYSFTSYW   | ISWVRQMPGKGLEWMGR | IDPSDSYT   | NYSPSFQ       | GHVTISADKSISTAYLQWSSLKASDTAMYYC  | AR                        | WGQGLTVTVSS |
| <u>γ6-21</u>     | EVQLVQSGAEVKKPGESLRISCKGS  | GYSFTSYW   | ISWVRQMPGKGLEWMGR | IDPSDSYT   | RYSPSFQ       | GHVTISADKSISTAYLQWSSLKASDTAMYYC  | AR <b>HLREAVADFPMDY</b>   | WG          |

The germ-line sequence is given for each V<sub>H</sub> family, with indication of framework regions (FR) and complementary determining regions (CDR). Highlighted amino-acids correspond to N-additions (in the CDR3 region) and somatic hyper-mutation events, whether it results in a silent mutation (green) or not (red). Clones with identical BCR sequences are grouped together.
