# Supplementary material for: Generation of Human Antigen-Specific Monoclonal IgM Antibodies Using Vaccinated “Human Immune System” Mice
Source: PubMed Central journal article supplement (PMC2949385; doi:10.1371/journal.pone.0013137), 2010-10-04
Supplement: pone.0013137.s005.pdf [file pone.0013137.s005.pdf]

**Table S4. IgM V<sub>H</sub> amino-acid sequence of generated TT-specific B cell clones.**

| CLONES        | -----FR1-----                    | ---CDR1---      | -----FR2-----            | ---CDR2---      | -----FR3-----                                   | -----CDR3-----         | ----FR4----      |
|---------------|----------------------------------|-----------------|--------------------------|-----------------|-------------------------------------------------|------------------------|------------------|
| <b>VH3-30</b> | <b>QVQLVESGGGVVQPGRSLRLSCAAS</b> | <b>GFTFSSYG</b> | <b>MHWVRQAPGKGLEWVAV</b> | <b>ISYDGSNK</b> | <b>YYADSVKGRFTISRDN SKNTLYLQMN SLRAEDTAVYYC</b> | <b>AR</b>              | <b>GQTTTVTVS</b> |
| <b>12G11</b>  | QVQLVESGGGVVQPGRSLRLSCAAS        | GFTFSSYA        | MHWVRQAPGKGLEWVAV        | ISYDGSNK        | YYADSVKGRFTISRDN SKNTLYLQMN SLRAEDTAVYYC        | ARTYGGKASIAARRDHYGMDVW | GQTTTVTVS        |
| <b>12C6</b>   | GGGVVQPGRSLRLSCAAS               | GFTFSSYA        | MHWVRQAPGKGLEWVAV        | ISYDGSNK        | YYADSVKGRFTISRDN SKNTLYLQMN SLRAEDTAVYYC        | ARTYGGKASIAARRDHYGMDVW | GQTTTVTVS        |
| <b>15D11</b>  | QVQLVESGGGVVQPGRSLRLSCAAS        | GFTFSSYA        | MHWVRQAPGKGLEWVAV        | ISYDGSNK        | YYADSVKGRFTISRDN SKNTLYLQMN SLRAEDTAVYYC        | ARTYGGKASIAARRDHYGMDVW | GQTTTVTVS        |
| <b>14H7</b>   | QVQLVESGGGVVQPGRSLRLSCAAS        | GFTFSSYA        | MHWVRQAPGKGLEWVAV        | ISYDGSNK        | YYADSVKGRFTISRDN SKNTLYLQMN SLRAEDTAVYYC        | ARTYGGKASIAARRDHYGMDVW | GQTTTVTVS        |
| <b>13C5</b>   | QVQLVESGGGVVQPGRSLRLSCAAS        | GFTFSSYA        | MHWVRQAPGKGLEWVAV        | ISYDGSNK        | YYADSVKGRFTISRDN SKNTLYLQMN SLRAEDTAVYYC        | ARTYGGKASIAARRDHYGMDVW | GQTTTVTVS        |
| <b>15C9</b>   | QVQLVESGGGVVQPGRSLRLSCAAS        | GFTFSSYA        | MHWVRQAPGKGLEWVAV        | ISYDGSNK        | YYADSVKGRFTISRDN SKNTLYLQMN SLRAEDTAVYYC        | ARTYGGKASIAARRDHYGMDVW | GQTTTVTVS        |
| <b>13E6</b>   | QVQLVESGGGVVQPGRSLRLSCAAS        | GFTFSSYA        | MHWVRQAPGKGLEWVAV        | ISYDGSNK        | YYADSVKGRFTISRDN SKNTLYLQMN SLRAEDTAVYYC        | ARTYGGKASIAARRDHYGMDVW | GQTTTVTVS        |
| <b>11D10</b>  | QVQLVESGGGVVQPGRSLRLSCAAS        | GFTFSSYA        | MHWVRQAPGKGLEWVAV        | ISYDGSNK        | YYADSVKGRFTISRDN SKNTLYLQMN SLRAEDTAVYYC        | ARTYGGKASIAARRDHYGMDVW | GQTTTVTVS        |
| <b>11G9</b>   | QVQLVESGGGVVQPGRSLRLSCAAS        | GFTFSSYA        | MHWVRQAPGKGLEWVAV        | ISYDGSNK        | YYADSVKGRFTISRDN SKNTLYLQMN SLRAEDTAVYYC        | ARTYGGKASIAARRDHYGMDVW | GQTTTVTVS        |
| <b>14H11</b>  | PGRSLRLSCAAS                     | GFTFSSYA        | MHWVRQAPGKGLEWVAV        | ISYDGSNK        | YYADSVKGRFTISRDN SKNTLYLQMN SLRAEDTAVYYC        | ARTYGGKASIAARRDHYGMDVW | GQTTTVTVS        |
| <b>12G5</b>   | QVQLVESGGGVVQPGRSLRLSCAAS        | GFTFSSYA        | MHWVRQAPGKGLEWVAV        | ISYDGSNK        | YYADSVKGRFTISRDN SKNTLYLQMN SLRAEDTAVYYC        | ARTYGGKASIAARRDHYGMDVW | GQTTTVTVS        |
| <b>12B5</b>   | QVQLVESGGGVVQPGRSLRLSCAAS        | GFTFSSYA        | MHWVRQAPGKGLEWVAV        | ISYDGSNK        | YYADSVKGRFTISRDN SKNTLYLQMN SLRAEDTAVYYC        | ARTYGGKASIAARRDHYGMDVW | GQTTTVTVS        |
| <b>10C6</b>   | QVQLVESGGGVVQPGRSLRLSCAAS        | GFTFSSYG        | MHWVRQAPGKGLEWVAV        | ISYDGSNK        | YYADSVKGRFTISRDN SKNTLYLQMN SLRAEDTAVYYC        | AKGGWNYYGSGSYW         | GQTTTVTVS        |
| <b>8B11</b>   | QVQLVESGGGVVQPGRSLRLSCAAS        | GFTFSSYG        | MHWVRQAPGKGLEWVAV        | ISYDGSNK        | YYADSVKGRFTISRDN SKNTLYLQMN SLRAEDTAVYYC        | AKGGWNYYGSGSYW         | GQTTTVTVS        |
| <b>8D11</b>   | QVQLVESGGGVVQPGRSLRLSCAAS        | GFTFSSYG        | MHWVRQAPGKGLEWVAV        | ISYDGSNK        | YYADSVKGRFTISRDN SKNTLYLQMN SLRAEDTAVYYC        | AKGGWNYYGSGSYW         | GQTTTVTVS        |
| <b>6E7</b>    | QVQLVESGGGVVQPGRSLRLSCAAS        | GFTFSSYA        | MHWVRQAPGKGLEWVAV        | ISYDGSNK        | YYADSVKGRFTISRDN SKNTLYLQMN SLRAEDTAVYYC        | ARAPGGRGVIIWAFDYW      | GQTTTVTVS        |
| <b>3F7</b>    | GVVQPGRSLRLSCAAS                 | GFTFSSYG        | MHWVRQAPGKGLEWVAV        | ISYDGSNK        | YYADSVKGRFTISRDN SKNTLYLQMN SLRAEDTAVYYC        | AKDRTAAGTPKRSWFDPW     | GQTTTLTVTS       |
| <b>13F5</b>   | QVQLVESGGGVVQPGRSLRLSCAAS        | GFTFSSYG        | MHWVRQAPGKGLEWVAV        | ISYDGSNK        | YYADSVKGRFTISRDN SKNTLYLQMN SLRAEDTAVYYC        | AKQAGIAVAGSPDYW        | GQTTTLTVTS       |

Data are presented as in the **Table S2**.
